# Supplementary material for: Possible Long-Term Efficacy of Sitagliptin, a Dipeptidyl Peptidase-4 Inhibitor, for Slowly Progressive Type 1 Diabetes (SPIDDM) in the Stage of Non-Insulin-Dependency: An Open-Label Randomized Controlled Pilot Trial (SPAN-S)
Source: PubMed Central journal article supplement — Diabetes Ther. 2017 Sep 19;8(5):1123–34. doi: 10.1007/s13300-017-0299-7 (PMC5630555; doi:10.1007/s13300-017-0299-7), 2017-09-19
Supplement: 13300_2017_299_MOESM1_ESM.pdf [file 13300_2017_299_MOESM1_ESM.pdf]

# Study for prevention of autoimmune non-insulin-dependent diabetes mellitus with sitagliptin (SPAN-S) 実施計画書

## 1. 研究の背景・経緯

近年、GAD 抗体陽性ではあるがインスリン非依存状態にある糖尿病(以下、「インスリン非依存 GAD 抗体陽性糖尿病」)の病態、診断と治療に関する注目が高まっている。すなわち 2 型糖尿病の臨床像を呈した患者にも GAD 抗体が陽性を示す症例があり、発症・診断時はインスリン非依存状態である。日本人 2 型糖尿病患者の 3~5%を占めると考えられている本症は、緩徐に膵β細胞インスリン分泌能が低下・消失し、平均3年ほどで最終的にインスリン依存状態に移行する病態が多く、緩徐進行1型糖尿病 (Slowly progressive diabetes mellitus type 1:SPIDDM)とも呼ばれ始めている。こうしたインスリン非依存 GAD 抗体陽性糖尿病患者には、膵β細胞を温存していくという観点から、これまでの経口糖尿病薬で治療可能な時期でも早期にインスリン治療を開始すべきと考えられてきた。

一方、DPP-IV阻害薬(シタグリプチン)は、今までの血糖降下薬とは異なる作用機序で効果を発揮し、有効性や安全性に優れていることが海外で認められ、2009 年、本邦で初めて承認された。シタグリプチンはインクレチンと呼ばれる消化管ホルモンを不活化する酵素である DPP-IVを高選択的に阻害することで、インクレチンの作用を介して膵β細胞のインスリン分泌を促進し、過剰なグルカゴン分泌を抑制することにより血糖低下効果を発揮する新たな薬物療法である。このインクレチンには、消化管ホルモン GLP-1 (Glucagon-like peptide1)と、GIP (Gastric inhibitory polypeptide)の2種類があり、GLP-1に関しては、膵β細胞の増殖およびアポトーシスを抑制する生理作用があることが動物実験にて報告されている。

この DPP-IV阻害薬(シタグリプチン)は、2 型糖尿病における有効性は確立しているが、インスリン非依存 GAD 抗体陽性糖尿病における有効性は明らかにされていない。しかしながら、シタグリプチンにはインスリン分泌促進作用以外にグルカゴン分泌抑制があり、上述した膵β細胞の温存作用の報告がされているから、インスリン非依存 GAD 抗体陽性糖尿病での有効性が期待される。そこで、本研究ではインスリン非依存 GAD 抗体陽性糖尿病患者に対するシタグリプチンの血糖、膵β細胞機能および抗体等に対する影響について比較検討する研究を計画した。

## 2. 試験の目的

インスリン非依存 GAD 抗体陽性糖尿病におけるシタグリプチン(ジャヌビア)の有効性を検証するため、インスリン非依存 GAD 抗体陽性糖尿病患者に対し、シタグリプチン使用群とインスリン抵抗性改善作用を持ち国内で広く使用されているチアゾリジン薬ピオグリタゾン(アクトス)使用群に無作為割付を実施し、血糖コントロールや膵β細胞機能および抗体などに対する影響を比較検討する。

## 3. 対象患者

(1) 選択基準(同意取得時)

以下の基準を全て満たす患者を対象とする

- 1) HbA1c 6.9%以上 8.4%以下<NGSP 値>(6.5%以上 8.0%以下<JDS値>)の患者
- 2) GAD 抗体陽性で空腹時血清 CPR が 1.0 ng/mL 以上の患者
- 3) 20 歳以上 80 歳未満の患者
- 4) 経口血糖降下薬として、ビッグアナイド薬服用中の患者は対象とするが、スルホニル尿素薬、 $\alpha$ -グルコシダーゼ阻害薬、速効型インスリン分泌促進薬(グリニド薬)、ピオグリタゾン、DPP-4 阻害薬は、登録前 2 ヶ月間服用していない患者
- 5) インスリン注射による治療を行っていない患者
- 6) リラグルチド注射あるいはエキセナチド注射による治療を行っていない患者
- 7) 性別不問
- 8) 文章による同意が得られた患者

(2) 除外基準(同意取得時)

以下のいずれかに抵触する患者は本試験に組み入れないこととする

- 1) 妊娠している、または妊娠を予定している患者
- 2) 中等度以上の腎機能障害を有している患者。中等度以上の腎機能障害は、クレアチニンクリアランスが 50 mL/min 以下、あるいは血清クレアチニン値が、男性で 1.5 mg/dL 以上、女性で 1.3 mg/dL 以上の場合と規定する
- 3) 重篤な合併症あるいは併発症を有し、試験担当医師が適切でないと判断した患者
- 4) その他、試験担当医師が適切でないと判断した患者

4. 被験者に説明し同意を得る方法

- (1) 各施設の治験審査委員会あるいは倫理委員会で承認の得られた同意説明文書を患者さんに渡し、文書による十分な説明を行い、患者さんの自由意思による同意を得る。
- (2) 患者さんの同意に影響を及ぼすと考えられる有効性や安全性等の情報が得られたときや、患者さんの同意に影響を及ぼすような実施計画等の変更が行われるときは、速やかに患者さんに情報提供し、試験等に参加するか否かについて患者さんの意思を予め確認するとともに、事前に各施設の倫理委員会の承認を得て、同意説明文書等の改訂を行い、患者さんの再同意を得る。

5. 試験の方法

(1) 試験の種類・デザイン

多施設共同オープン・前向き無作為比較試験

(multi-center, open, prospective, randomized and comparative trial)

(2) 試験のアウトライン

目標値 HbA1c 7.0%未満<NGSP 値> (6.5%未満<JDS値>)

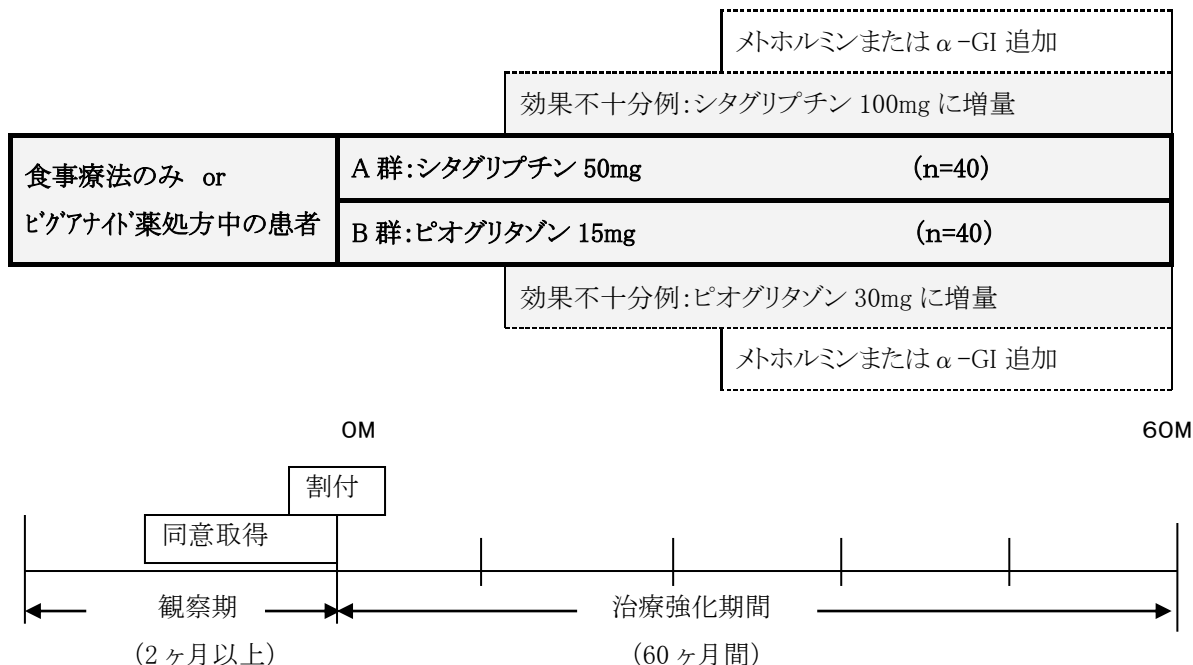

注: 試験薬の増量およびメトホルミンまたは  $\alpha$ -グルコシダーゼ阻害薬 ( $\alpha$ -GI) の追加時期は、主治医判断とする。

(3) 投与方法

1) 観察期(2ヶ月以上)～スクリーニングと割り付け

選択基準に合致し、除外基準に該当しない症例に対し、本試験の概要を説明し、文書にて同意を得る。対象患者の半数をシタグリプチン使用群、残り半数をピオグリタゾン使用群にランダムに割り付ける。ランダム割り付けは、中央登録インターネットウェブにおいて、年齢・性別・HbA1c・GAD 抗体・ビグアナイド薬併用の有無を割り付け調整因子として、コンピュータを用いた無作為割り付け(最小化法)を実施する。

2) 治療期間

①シタグリプチン使用群

シタグリプチン使用群に割り付けられた患者について、それまでの治療の継続に加えてシタグリプチンの投与を開始する。投与量・用法は 50 mg を 1 日 1 回、朝食後から開始とする。血糖コントロールとしては、HbA1c 7.0%未満<NGSP 値> (6.5%未満<JDS値>)を目標とする。シタグリプチン使用群においては、HbA1c 7.0%未満<NGSP 値> (6.5%未満<JDS値>)に至らなかった場合は、まずシタグリプチンを 100 mg に増量する。それでも、HbA1c 7.0%未満<NGSP 値> (6.5%未満<JDS値>)に至らなかった場合は、塩酸メトホルミン 250mg～2250mg または  $\alpha$ -グルコシダーゼ阻害薬の追加を行う。試験薬の増量およびメトホルミンまたは

$\alpha$ -グルコシダーゼ阻害薬( $\alpha$ -GI)の追加時期は、主治医判断とする。HbA1c 9.4%以上<NGSP 値>(9.0%以上<JDS 値>)となった場合は試験終了とし、インスリン療法の導入を含めた治療法の変更を行う。

## ②ピオグリタゾン使用群

ピオグリタゾン使用群に割り付けられた患者については、それまでの治療の継続に加えてピオグリタゾンの投与を開始する。投与量・用法は15 mgを1日1回、朝食後から開始とする。血糖コントロールとしては、HbA1c 7.0%未満<NGSP 値>(6.5%未満<JDS 値>)を目標とする。ピオグリタゾン使用群においては、HbA1c 7.0%未満<NGSP 値>(6.5%未満<JDS 値>)に至らなかった場合は、まずピオグリタゾンを30 mgに増量する。それでも、HbA1c 7.0%未満<NGSP 値>(6.5%未満<JDS 値>)に至らなかった場合は、塩酸メホルミン 250mg~2250mgまたは $\alpha$ -グルコシダーゼ阻害薬の追加を行う。試験薬の増量およびメホルミンまたは $\alpha$ -グルコシダーゼ阻害薬( $\alpha$ -GI)の追加時期は、主治医判断とする。HbA1c 9.4%以上<NGSP 値>(9.0%以上<JDS 値>)となった場合は試験終了とし、インスリン療法の導入を含めた治療法の変更を行う。

## 3) 併用薬に関する規定

試験期間中、インスリン製剤は使用しない。

経口血糖降下薬については試験方法で述べた通りである。

合併症および併発症のために試験前より使用していた薬剤については、介入期間中変更しないことが望ましいが、試験担当医の判断により適切な治療を行う。

## 6. 評価項目

### (1) 主要評価項目

HbA1c の推移および HbA1c が 9.4%以上<NGSP 値>(9.0%以上<JDS 値>)のため試験中止になった症例の割合と中止までの期間

### (2) 副次的評価項目

- 1年ごとに行うブドウ糖負荷試験での、血糖値、血清 CPR 値の推移
- 体重の推移
- 血圧の推移
- 各種膵島自己抗体 (GAD 抗体、IA-2 抗体、IAA、ZnT8 抗体) の推移
- 空腹時血糖の推移

### (3) 安全性評価

- 副作用/低血糖 発現率

## 7. 検査項目

### 1)スクリーニング(\*登録時の必須項目)

- 患者背景 : ID、イニシャル、性別、生年月日、既往歴、現病歴など
- 身体計測 : 身長、体重、BMI
- 血圧
- 血算 : 白血球数、白血球分画、赤血球数、血小板数、ヘモグロビン、ヘマトクリット値
- 生化学検査 : 空腹時血糖、HbA1c\*、空腹時 CPR\*、GAD 抗体\*、  
TG、HDL-C、LDL-C、ALT、AST、 $\gamma$ -GTP、LDH、血清クレアチニン、BUN、  
尿酸、CK、血清アミラーゼ
- 尿定性検査:尿糖、尿蛋白、尿アセトン体

### 2)試験開始時および1年毎検査(SRLへ提出)

- 75 g 経口ブドウ糖負荷試験(負荷前、30、60、90、120分):血糖、血清 CPR
- GAD 抗体、IA-2 抗体、IAA、高感度 IL-10、TPO 抗体、サイログロブリン(Tg)抗体
- 保存血清検査(SRLが血清を埼玉医科大学へ。埼玉医大で一括保管)~ZnT8 抗体、IP-10 など

### 3)2ヶ月毎の来院時検査(※:任意項目)

- 体重、血圧
- 血糖(空腹時あるいは随時)、HbA1c
- (※) 血清 CPR
- (※) 尿定性検査:尿糖、尿蛋白、尿アセトン体
- (※) 血液検査(血液生化学、血算)

### 4)その他の検査(任意の来院時に一度測定)

- HLA DNA タイピング(DRB1・DQB1)

※ 原則として、来院時の診察・検査は2ヵ月毎とし試験期間は5年間とするが、1年毎に独立モニタリング委員会の審議により試験の継続を検討する。

### 【有害事象】

- 1) 有害事象が発生した場合は関係製薬会社に有害事象発生を連絡する。
- 2) 有害事象には、各種検査値異常も含める。有害事象名、発現日、程度・重篤度、転帰、試験薬との因果関係カルテおよび症例報告書に記載する。

程度については、

軽度 : 無処置で投与継続可能な状態

中等度 : 何らかの処置により投与継続可能な状態

重度：投与を中止あるいは中止すべき状態などと定義する。

## 8. 中止基準

試験担当医師は以下の理由で試験継続が不可能と判断した場合には、試験薬の投与を中止し、中止・脱落時点で必要な検査を行い有効性・安全性の評価を行う。

- (1) 重大な試験計画書違反
- (2) 同意の撤回
- (3) 有害事象により研究の継続が困難な場合
- (4) 死亡
- (5) 追跡不能状態になった場合
- (6) その他の理由により、医師が調査を中止することが適当と判断した場合

## 9. 倫理

### 1) 倫理委員会

本臨床研究に先立ち、倫理委員会において、臨床研究実施計画書、インフォームド・コンセントを得るのに使用される方法ならび資料の審議・承認を受けることによって、患者の人権、安全および福祉の保護を保証する。

### 2) 患者の同意

本臨床研究に参加する前に、下記説明事項を含む文書を用いて患者に十分に説明し、患者の自由意思による同意を文書で得る。

### 3) 患者の秘密保全

ヘルシンキ宣言に基づき、患者の人権、安全および福祉に対する配慮を行うと共に、患者のプライバシーを尊重し、患者に関する機密保持に努める。

## 10. データの集計および統計解析方法

### 1) データ集計

試験担当医師から症例報告書を研究事務局に送付する。

研究会事務局は各施設から ITT (intention to treat) に従って全データを入力し、集計解析を行う。

### 2) 解析方法

両群における各評価項目の推移を群内、群間にて比較・評価する。比較には paired  $t$ -test、unpaired  $t$ -test もしくは  $\chi^2$  検定を用いる。また、投薬中止まで期間を勘案した比較においては、Kaplan Meier 法をもちいた上で log-rank 検定を実施する。

## 11. 目標症例数

登録目標症例数 全 80 例(各群 40 例)

12. 試験実施期間(予定)

症例登録期間 平成 22 年 9 月 1 日～平成 27 年 12 月 31 日(64 ヶ月間)

介入期間 ～平成 32 年 12 月 31 日

13. 健康被害の補償

当臨床研究は、既承認薬の承認の範囲を超える使用と判断される可能性があるため、医薬品医療機関総合機構の副作用被害救済制度の支給の対象とならない恐れがある。そのため、被験者の補償は「医法研保証のガイドライン」に沿って行う。原則として、臨床試験に起因して健康被害が生じた場合は、医療費、医療手当は健康保険などのからの給付を除いた患者の自己負担額を埼玉医科大学病院が支払い、保証金は主任研究者が加入した(株)東京海上日動火災保険「臨床研究に関する賠償責任保険」で対応する。
