# Supplementary material for: Possible Long-Term Efficacy of Sitagliptin, a Dipeptidyl Peptidase-4 Inhibitor, for Slowly Progressive Type 1 Diabetes (SPIDDM) in the Stage of Non-Insulin-Dependency: An Open-Label Randomized Controlled Pilot Trial (SPAN-S)
Source: Springer Nature journal article supplement (doi:10.1007/s13300-017-0299-7), 2017-09-19
Supplement: MOESM4 [file 15071182]

**Fig. S1** Individual long-term C-peptide response to the OGTT, GADAb and IA-2Ab titers for 48 months in the patients with sitagliptin treatment. Individual longitudinal change ratios of  $\Sigma$ C-peptide values, GADAb and IA-2Ab titers from baseline are shown in the 5 patients followed for 48 months in the S group, with the HLA DRB1-DQB1 genotypes represented (Fig. S1A, S1B, S1C, S1D and S1E are cases S1, S2, S3, S4 and S5, respectively, in Table S1). In cases S1, S4 and S5, the IA-2Ab were negative during 48 months of follow-up. Susceptible HLA DRB1-DQB1 haplotypes (S) = DRB1\*04:05-DQB1\*04:01, DRB1\*09:01-DQB1\*03:03, DRB1\*08:02-DQB1\*03:02; Protective HLA DRB1-DQB1 haplotypes = DRB1\*15:01-DQB1\*06:02, DRB1\*15:02-DQB1\*06:01; Neutral HLA DRB1-DQB1 haplotypes (N) = other haplotypes.

S1A

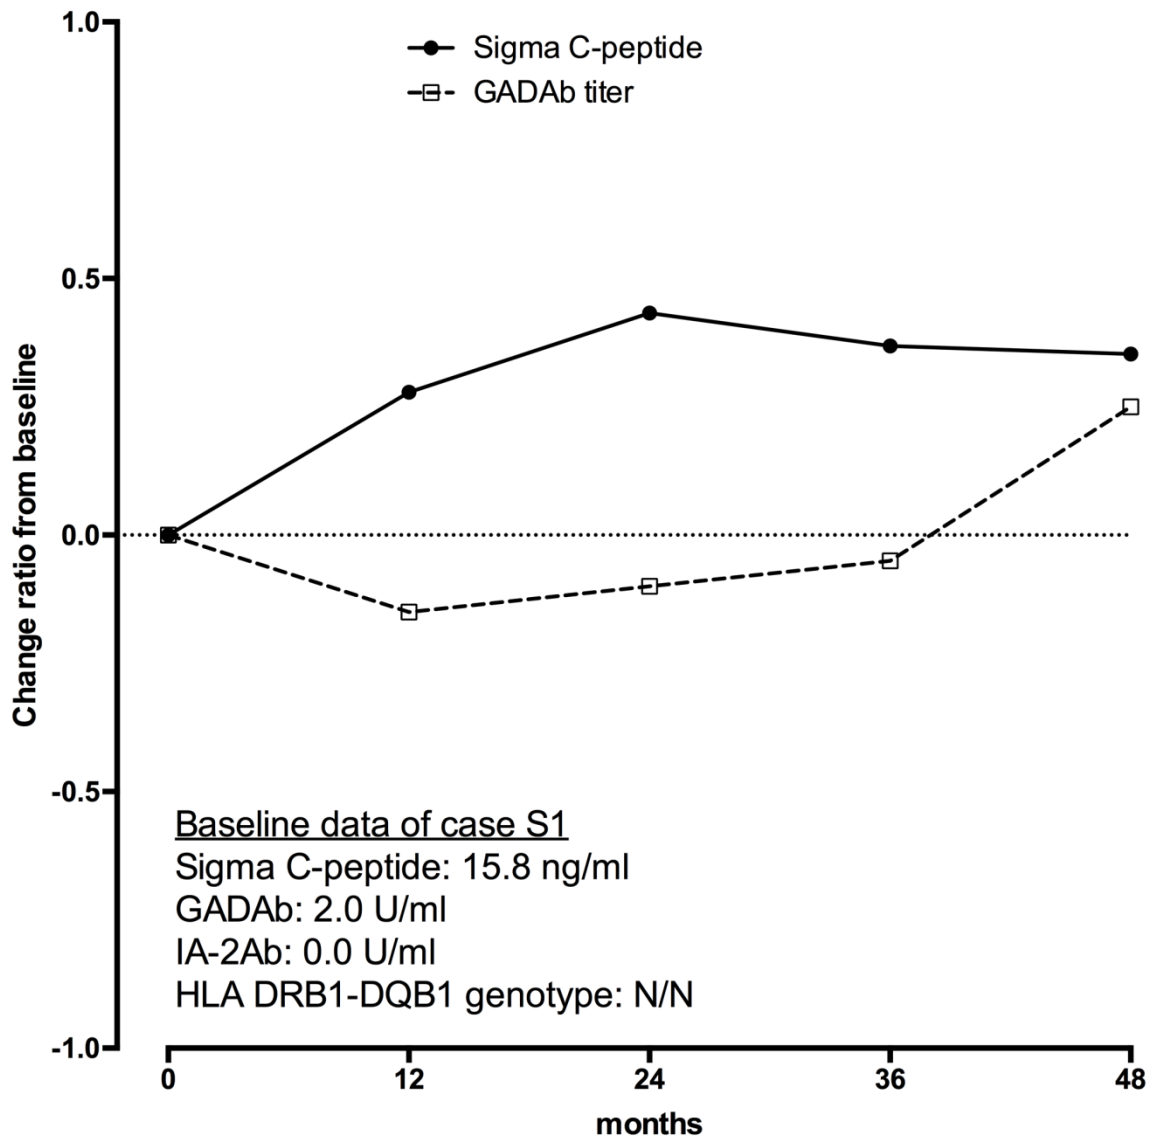

S1B

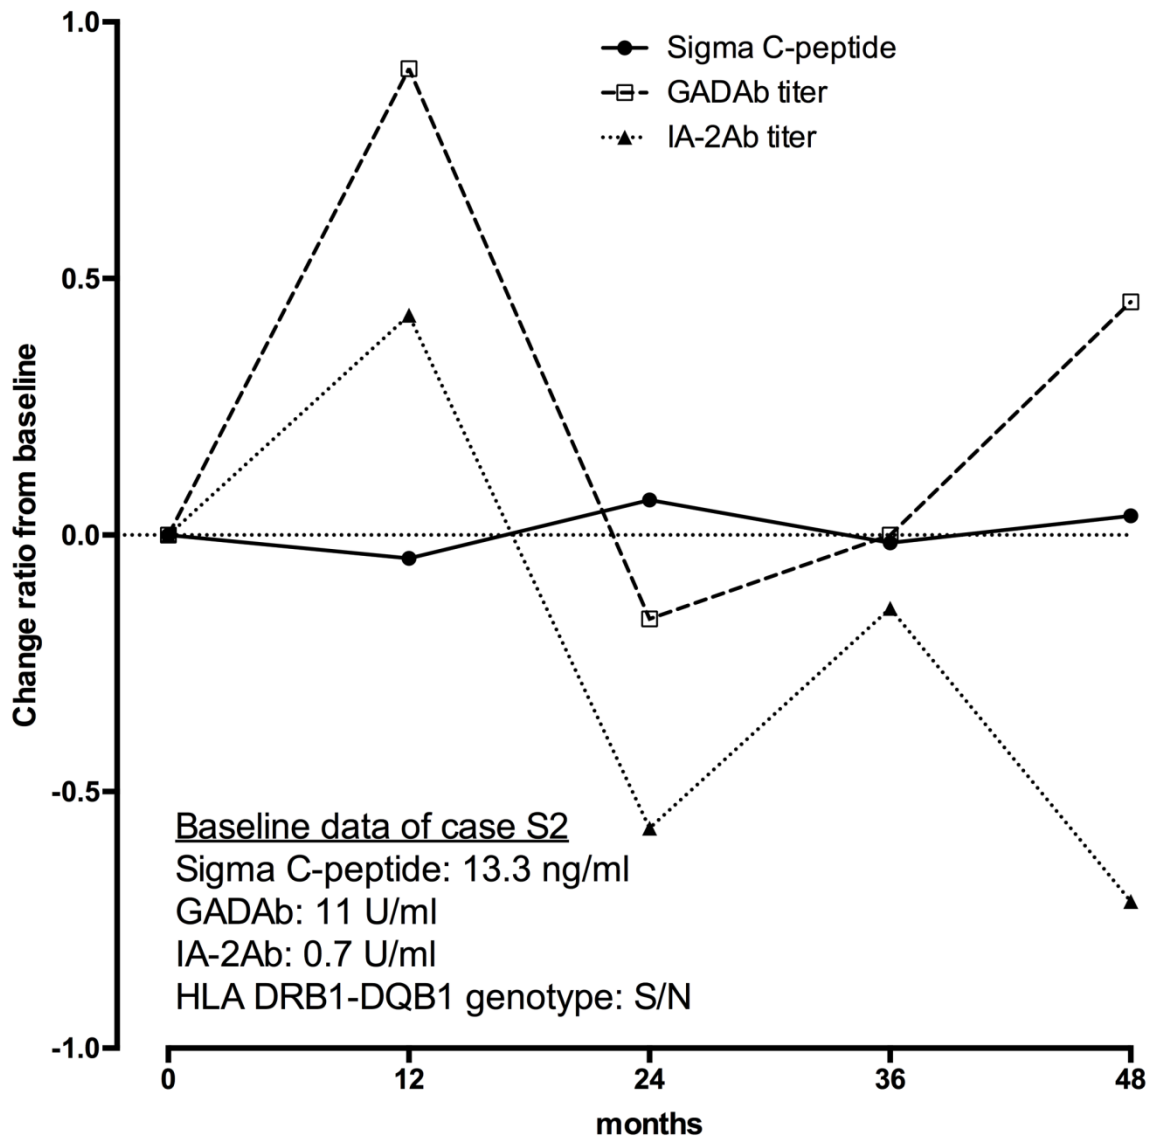

S1C

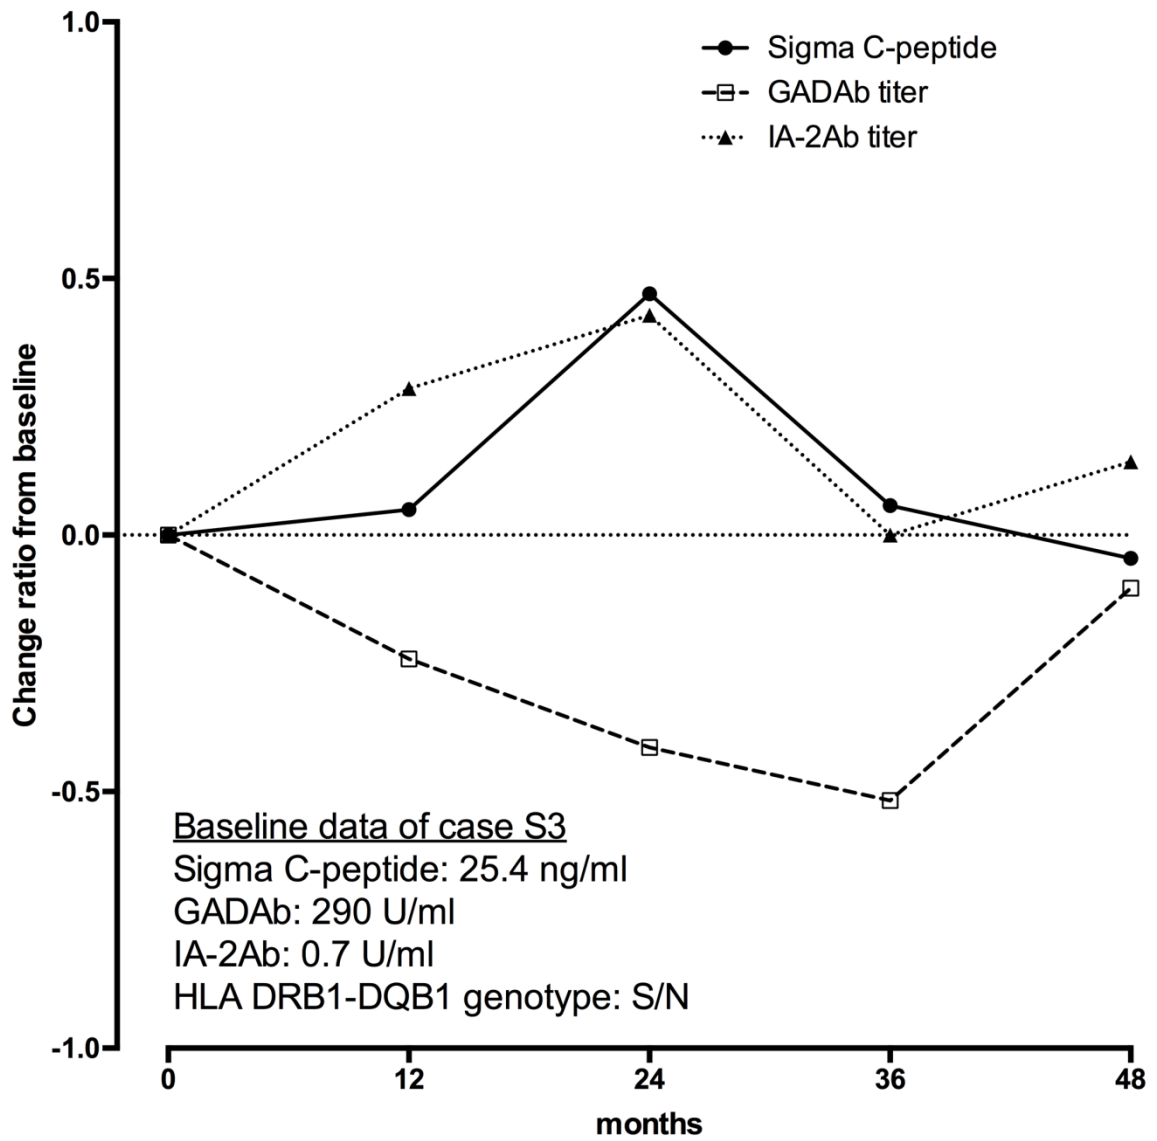

S1D

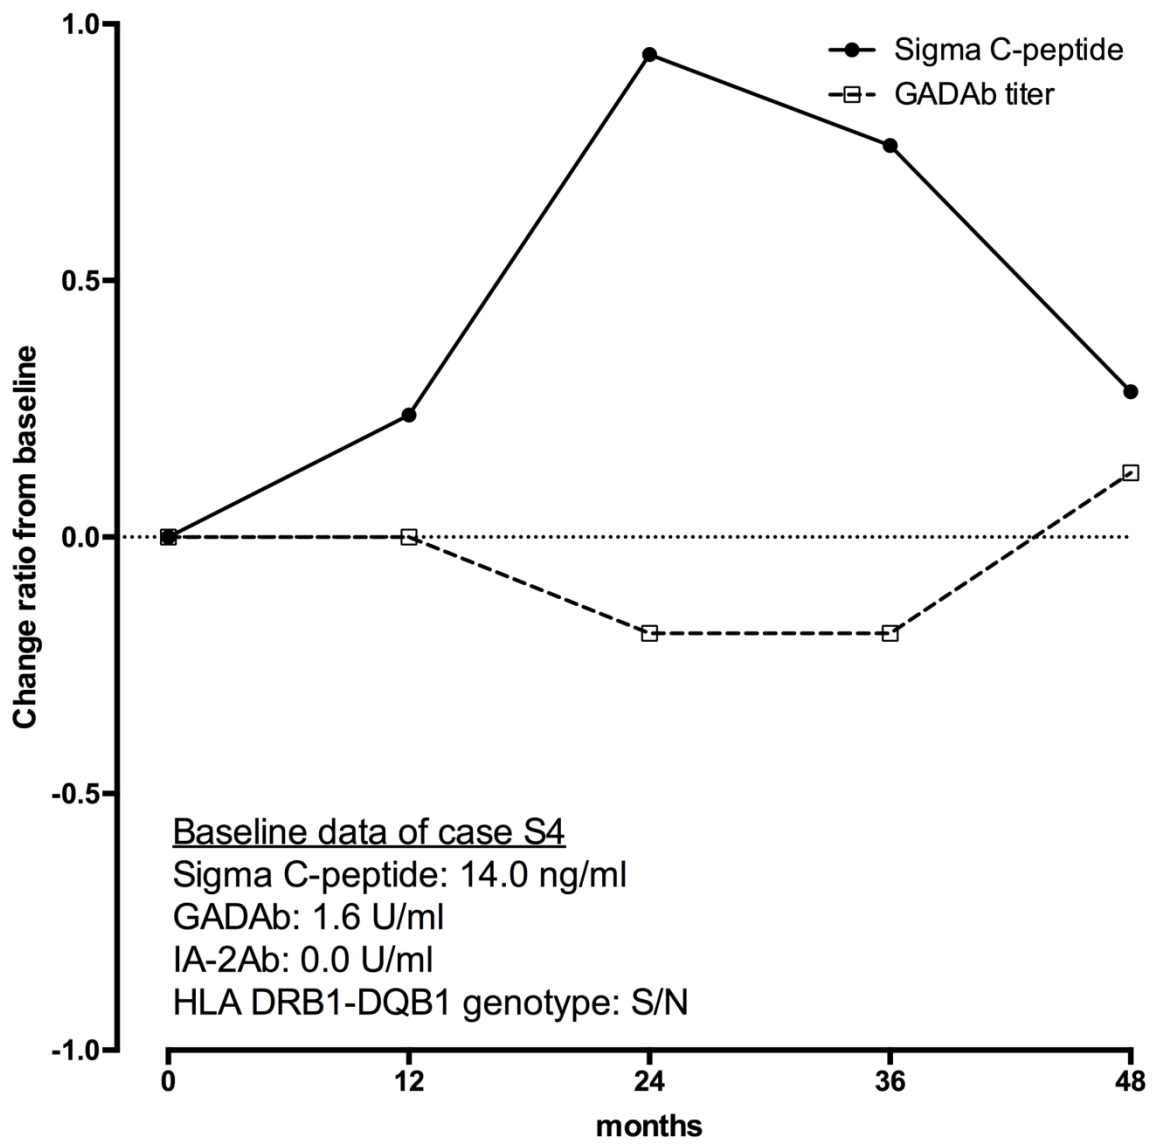

S1E

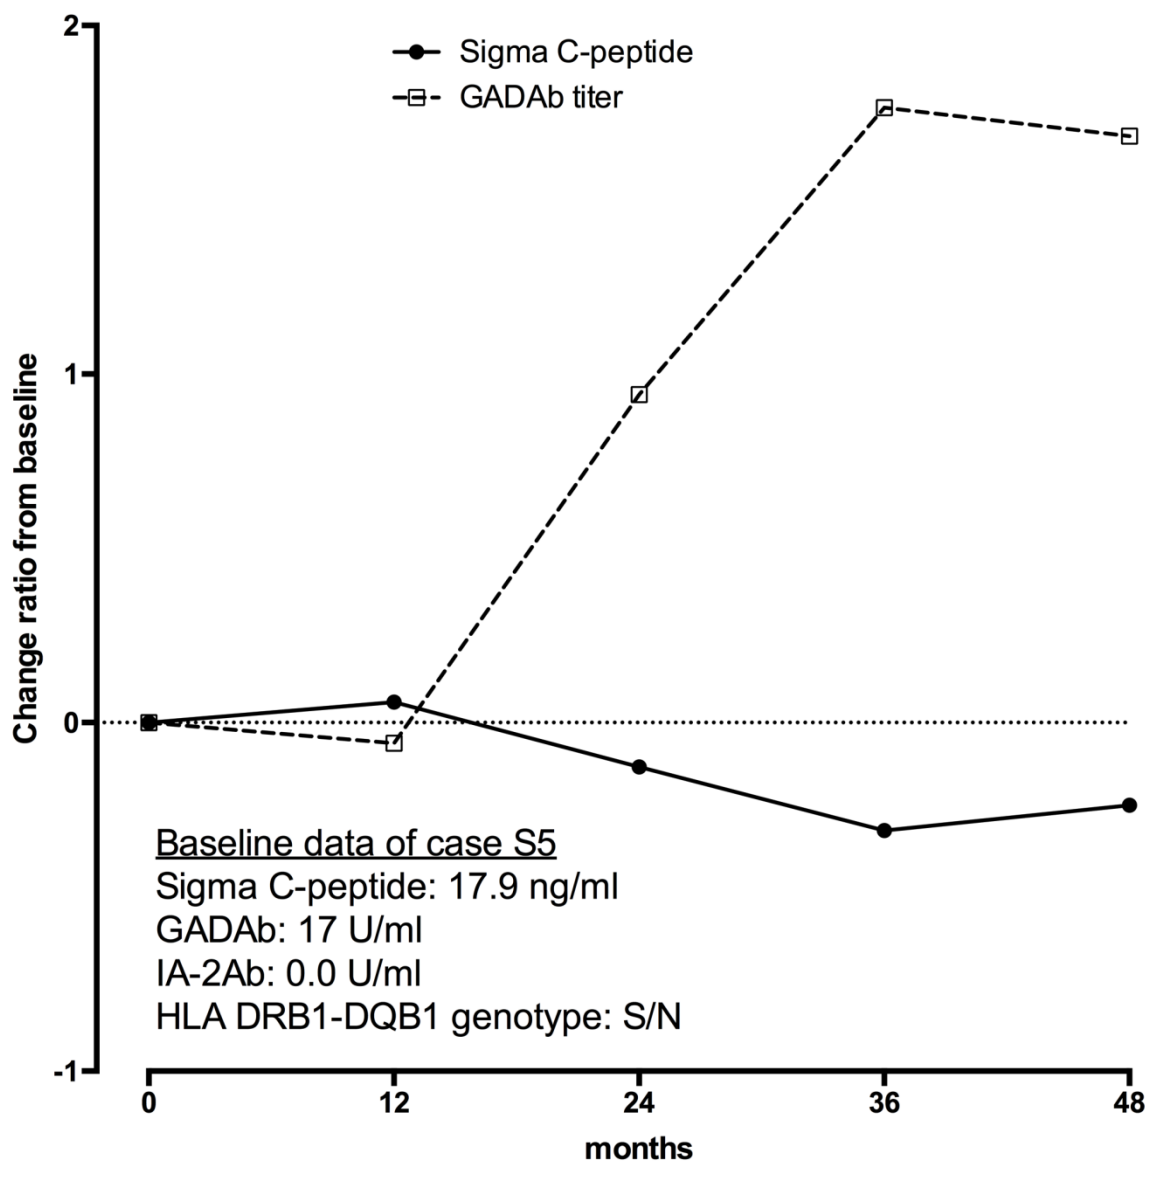

**Fig. S2** The correlation between the change ratios of the GADAb titers and of the  $\Sigma$ C-peptide values from baseline in the P group. A nonsignificant inverse correlation was observed (Spearman's rank correlation coefficient = -0.478,  $p = 0.101$ ).

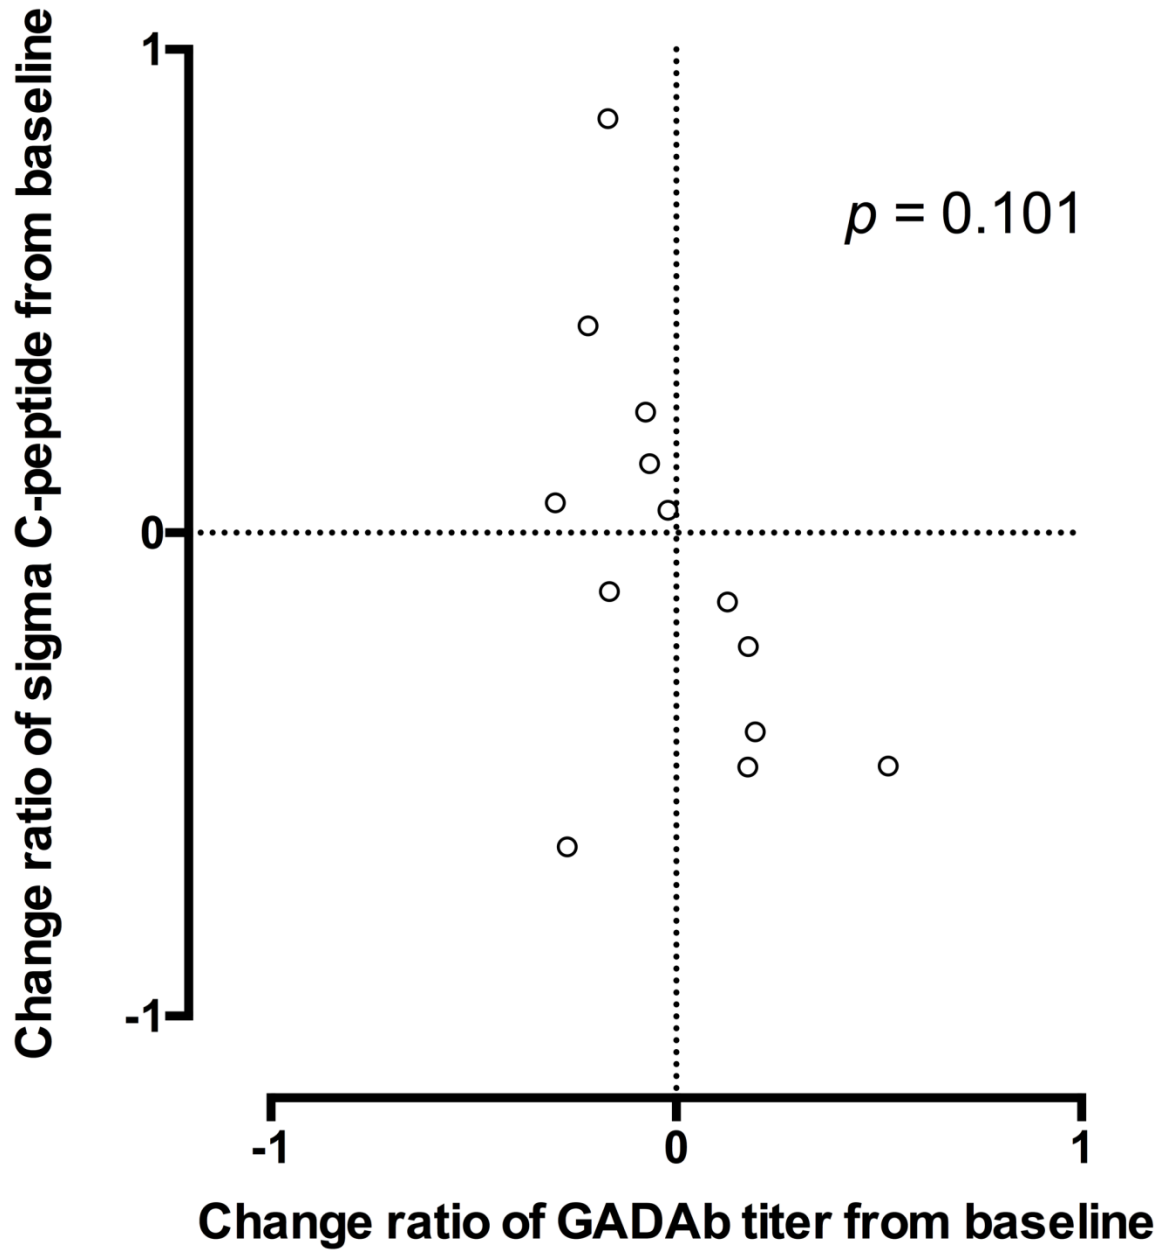

**Table S1** Longitudinal changes in BMI, HbA1c, beta-cell function and GADAb titers of patients with 12, 24, 36 and 48 months of follow-up

| <b>12 months of follow-up</b> |                          |                         |             |                          |                |                          |            |             |                    |                  |
|-------------------------------|--------------------------|-------------------------|-------------|--------------------------|----------------|--------------------------|------------|-------------|--------------------|------------------|
|                               | Sitagliptin group (n=6)  |                         |             |                          |                | Pioglitazone group (n=5) |            |             |                    |                  |
| Time (months)                 | BMI (kg/m <sup>2</sup> ) | HbA1c (%)               | ΣPG (mg/dl) | ΣC-peptide (ng/ml)       | GADAb (U/ml)   | BMI (kg/m <sup>2</sup> ) | HbA1c (%)  | ΣPG (mg/dl) | ΣC-peptide (ng/ml) | GADAb (U/ml)     |
| 0                             | 23.2 +- 6.2              | 7.5 +- 0.6              | 1333 +- 325 | 18.4 +- 5.1              | 7.7 (1.6-290)  | 23.9 +- 3.9              | 7.3 +- 0.6 | 1301 +- 202 | 16.5 +- 6.8        | 8.5 (1.4-12000)  |
| 12                            | 23.3 +- 5.8              | 6.7 +- 0.9 <sup>a</sup> | 1232 +- 303 | 21.0 +- 6.3 <sup>a</sup> | 10.5 (1.7-220) | 24.6 +- 5.2              | 7.1 +- 0.6 | 1182 +- 107 | 15.7 +- 5.9        | 5.0 (1.2-15000)  |
| <b>24 months of follow-up</b> |                          |                         |             |                          |                |                          |            |             |                    |                  |
|                               | Sitagliptin group (n=6)  |                         |             |                          |                | Pioglitazone group (n=4) |            |             |                    |                  |
| Time (months)                 | BMI (kg/m <sup>2</sup> ) | HbA1c (%)               | ΣPG (mg/dl) | ΣC-peptide (ng/ml)       | GADAb (U/ml)   | BMI (kg/m <sup>2</sup> ) | HbA1c (%)  | ΣPG (mg/dl) | ΣC-peptide (ng/ml) | GADAb (U/ml)     |
| 0                             | 23.2 +- 6.2              | 7.5 +- 0.6              | 1333 +- 325 | 18.4 +- 5.1              | 7.7 (1.6-290)  | 24.9 +- 3.7              | 7.5 +- 0.5 | 1368 +- 158 | 18.4 +- 6.3        | 5.9 (1.4-12000)  |
| 12                            | 23.3 +- 5.8              | 6.7 +- 0.9 <sup>a</sup> | 1232 +- 303 | 21.0 +- 6.3 <sup>a</sup> | 10.5 (1.7-220) | 25.8 +- 5.1              | 7.2 +- 0.7 | 1160 +- 111 | 18.0 +- 3.1        | 3.95 (1.2-15000) |
| 24                            | 23.3 +- 6.3              | 6.9 +- 0.8              | 1334 +- 203 | 23.3 +- 8.4              | 7.75 (1.8-170) | 25.4 +- 4.9              | 6.8 +- 0.2 | 1091 +- 169 | 19.9 +- 8.8        | 3.05 (1.36-4200) |
| <b>48 months of follow-up</b> |                          |                         |             |                          |                |                          |            |             |                    |                  |
|                               | Sitagliptin group (n=5)  |                         |             |                          |                | Pioglitazone group (n=2) |            |             |                    |                  |
| Time (months)                 | BMI (kg/m <sup>2</sup> ) | HbA1c (%)               | ΣPG (mg/dl) | ΣC-peptide (ng/ml)       | GADAb (U/ml)   | BMI (kg/m <sup>2</sup> ) | HbA1c (%)  | ΣPG (mg/dl) | ΣC-peptide (ng/ml) | GADAb (U/ml)     |
| 0                             | 21.7 +- 5.5              | 7.4 +- 0.6              | 1367 +- 350 | 17.3 +- 4.9              | 11 (1.6-290)   | 25.0 +- 0.8              | 7.8 +- 0.6 | 1357 +- 271 | 13.8 +- 0.2        | 4.95 (1.4-8.5)   |
| 12                            | 21.9 +- 5.2              | 6.9 +- 0.9 <sup>a</sup> | 1279 +- 315 | 19.2 +- 5.1              | 16 (1.7-220)   | 25.0 +- 0.7              | 7.7 +- 0.8 | 1170 +- 56  | 16.1 +- 0.4        | 3.1 (1.2-5)      |
| 24                            | 23.3 +- 6.3              | 7.0 +- 0.9              | 1362 +- 214 | 23.4 +- 9.4              | 9.2 (1.3-170)  | 25.1 +- 0.9              | 6.8 +- 0.1 | 1196 +- 199 | 17.0 +- 5.5        | 3.0 (1.6-4.4)    |
| 36                            | 21.7 +- 5.5              | 6.6 +- 0.7 <sup>a</sup> | 1350 +- 174 | 19.7 +- 6.6              | 11 (1.3-140)   | 25.9 +- 1.0              | 7.1 +- 0.1 | 1177 +- 151 | 13.9 +- 3.2        | 4.55 (2.6-6.5)   |
| 48                            | 21.4 +- 4.9              | 6.9 +- 0.7              | 1365 +- 391 | 18.2 +- 4.7              | 16 (1.8-260)   | 25.5 +- 0.6              | 7.2 +- 0.6 | 1122 +- 228 | 12.2 +- 1.7        | 5.45 (2-8.9)     |

Data are n (%), mean+-SD or median (range)

BMI, body mass index; PG, plasma glucose; GADAb, glutamic acid decarboxylase autoantibodies

Multiply by 0.331 to convert C-peptide values to nanomoles per liter. The values of BMI, HbA1c, ΣPG, ΣC-peptide and GADAb titers were not significantly different between the sitagliptin and pioglitazone groups at any time point in any of the follow-up periods

<sup>a</sup>  $p < 0.05$  vs 0 months (paired *t*-test)



**Table S2** Individual longitudinal changes in BMI, HbA1c, ΣC-peptide values and GADAb titers

| Time (months)                           | Sitagliptin group       |                       |                          |           |             |                    |              | Time (months)                | Pioglitazone group       |                       |                          |           |             |                    |              |
|-----------------------------------------|-------------------------|-----------------------|--------------------------|-----------|-------------|--------------------|--------------|------------------------------|--------------------------|-----------------------|--------------------------|-----------|-------------|--------------------|--------------|
|                                         | Sitagliptin dosage (mg) | Metformin dosage (mg) | BMI (kg/m <sup>2</sup> ) | HbA1c (%) | ΣPG (mg/dl) | ΣC-peptide (ng/ml) | GADAb (U/ml) |                              | Pioglitazone dosage (mg) | Metformin dosage (mg) | BMI (kg/m <sup>2</sup> ) | HbA1c (%) | ΣPG (mg/dl) | ΣC-peptide (ng/ml) | GADAb (U/ml) |
| Case S1 (56-year-old male)              |                         |                       |                          |           |             |                    |              | Case P1 (60-year-old female) |                          |                       |                          |           |             |                    |              |
| 0                                       | 50                      | 750                   | 24.0                     | 8.2       | 1750        | 15.8               | 2.0          | 0                            | 15                       | 0                     | 20.2                     | 7.1       | 1403        | 27.1               | 3.3          |
| 12                                      | 50                      | 750                   | 24.7                     | 7.6       | 1514        | 20.2               | 1.7          | 12                           | 15                       | 0                     | 20.6                     | 6.9       | 1022        | 22.6               | 2.9          |
| 24                                      | 50                      | 750                   | 24.1                     | 6.9       | 1577        | 22.6               | 1.8          | 24                           | 15                       | 0                     | 19.7                     | 6.7       | 960         | 31.9               | 1.7          |
| 36                                      | 50                      | 750                   | 23.9                     | 6.6       | 1363        | 21.6               | 1.9          | Case P2 (57-year-old female) |                          |                       |                          |           |             |                    |              |
| 48                                      | 50                      | 750                   | 24.5                     | 6.7       | 1593        | 21.4               | 2.5          | 0                            | 15                       | 750                   | 25.5                     | 8.2       | 1548        | 13.7               | 8.5          |
| Case S2 (64-year-old female)            |                         |                       |                          |           |             |                    |              | 12                           | 30                       | 750                   | 24.5                     | 8.2       | 1130        | 16.4               | 5.0          |
| 0                                       | 50                      | 500                   | 17.9                     | 7.8       | 1723        | 13.3               | 11           | 24                           | 30                       | 750                   | 24.4                     | 6.7       | 1055        | 20.9               | 4.4          |
| 12                                      | 50                      | 500                   | 19.1                     | 7.9       | 1505        | 12.7               | 21           | 36                           | 30                       | 750                   | 26.6                     | 7.0       | 1070        | 16.1               | 6.5          |
| 24                                      | 50                      | 500                   | 18.8                     | 7.6       | 1545        | 14.2               | 9.2          | 48                           | 30                       | 750                   | 25                       | 6.8       | 961         | 13.4               | 8.9          |
| 36                                      | 50                      | 1000                  | 18.3                     | 7.8       | 1608        | 13.1               | 11           | Case P3 (61-year-old male)   |                          |                       |                          |           |             |                    |              |
| 48                                      | 50                      | 1000                  | 18.3                     | 7.8       | 1851        | 13.8               | 16           | 0                            | 15                       | 750                   | 24.4                     | 7.3       | 1165        | 14                 | 1.4          |
| Case S3 (56-year-old female)            |                         |                       |                          |           |             |                    |              | 12                           | 15                       | 750                   | 25.4                     | 7.1       | 1209        | 15.8               | 1.2          |
| 0                                       | 50                      | 750                   | 15.6                     | 7.1       | 968         | 25.4               | 290          | 24                           | 15                       | 750                   | 25.8                     | 6.9       | 1337        | 13.1               | 1.6          |
| 12                                      | 50                      | 750                   | 15.7                     | 6.3       | 766         | 26.7               | 220          | 36                           | 15                       | 750                   | 25.1                     | 7.2       | 1283        | 11.6               | 2.6          |
| 24                                      | 50                      | 750                   | 15.2                     | 6.6       | 1064        | 37.4               | 170          | 48                           | 15                       | 1000                  | 25.9                     | 7.6       | 1283        | 11.0               | 2.0          |
| 36                                      | 50                      | 750                   | 15.9                     | 6.3       | 1365        | 26.9               | 140          | Case P4 (56-year-old female) |                          |                       |                          |           |             |                    |              |
| 48                                      | 50                      | 750                   | 15.9                     | 6.7       | 807         | 24.3               | 260          | 0                            | 15                       | 750                   | 29.4                     | 7.5       | 1354        | 18.7               | 12000        |
| Case S4 <sup>a</sup> (58-year-old male) |                         |                       |                          |           |             |                    |              | 12                           | 30                       | 750                   | 32.8                     | 6.5       | 1280        | 17.3               | 15000        |
| 0                                       | 50                      | 750                   | 21.1                     | 6.8       | 1216        | 14.0               | 1.6          | 24                           | 30                       | 1500                  | 31.6                     | 7.0       | 1011        | 13.7               | 4200         |
| 12                                      | 50                      | 750                   | 20.7                     | 5.9       | 1417        | 17.3               | 1.6          | Case P5 (45-year-old male)   |                          |                       |                          |           |             |                    |              |
| 24                                      | 50                      | 1500                  | 20.5                     | 5.8       | 1242        | 27.1               | 1.3          | 0                            | 15                       | 0                     | 19.9                     | 6.6       | 1037        | 9.1                | 160          |
| 36                                      | 50                      | 1500                  | 20.2                     | 6         | 1290        | 24.6               | 1.3          | 12                           | 30                       | 1500                  | 19.7                     | 7.0       | 1269        | 6.4                | 170          |
| 48                                      | 50                      | 1500                  | 20.1                     | 5.9       | 1285        | 17.9               | 1.8          |                              |                          |                       |                          |           |             |                    |              |
| Case S5 (27-year-old female)            |                         |                       |                          |           |             |                    |              |                              |                          |                       |                          |           |             |                    |              |
| 0                                       | 50                      | 0                     | 29.6                     | 7.1       | 1178        | 17.9               | 17           |                              |                          |                       |                          |           |             |                    |              |
| 12                                      | 50                      | 0                     | 29.2                     | 6.6       | 1191        | 19                 | 16           |                              |                          |                       |                          |           |             |                    |              |
| 24                                      | 50                      | 0                     | 30.0                     | 8.0       | 1380        | 15.6               | 33           |                              |                          |                       |                          |           |             |                    |              |
| 36                                      | 50                      | 0                     | 27.9                     | 6.4       | 1125        | 12.4               | 47           |                              |                          |                       |                          |           |             |                    |              |
| 48                                      | 50                      | 500                   | 28.0                     | 7.4       | 1290        | 13.7               | 46           |                              |                          |                       |                          |           |             |                    |              |
| Case S6 (74-year-old female)            |                         |                       |                          |           |             |                    |              |                              |                          |                       |                          |           |             |                    |              |
| 0                                       | 50                      | 750                   | 30.9                     | 7.9       | 1160        | 23.7               | 4.4          |                              |                          |                       |                          |           |             |                    |              |
| 12                                      | 50                      | 750                   | 30.3                     | 5.9       | 1001        | 29.8               | 5.0          |                              |                          |                       |                          |           |             |                    |              |
| 24                                      | 50                      | 750                   | 31.0                     | 6.4       | 1198        | 22.7               | 6.3          |                              |                          |                       |                          |           |             |                    |              |

BMI, body mass index; PG, plasma glucose; GADAb, glutamic acid decarboxylase autoantibodies

Age at baseline and gender are shown in parentheses

<sup>a</sup> An alpha-glucosidase inhibitor was only added in case S4 (voglibose 0.9 mg from 4 months)
